# Supplementary material for: Validation of a Brief Screening Instrument for Chemical Intolerance in a large U.S. National Sample
Source: Preprints.org preprint supplement (doi:10.20944/preprints202106.0618.v1), 2021-06-25
Supplement: Supplementary file 2 [file supplementary]

***Quick Environmental Exposure and Sensitivity Inventory (QEESI) Publications by Country**

**Austria**

Weiss, E. M., Singewald, E., Baldus, C., Hofer, E., Marksteiner, J., Nasrouei, S., . . . Holzer, P. (2017). [Differences in psychological and somatic symptom cluster score profiles between subjects with Idiopathic environmental intolerance, major depression and schizophrenia](https://pubmed.ncbi.nlm.nih.gov/28113122/). *Psychiatry Research, 249*, 187-194. doi:10.1016/j.psychres.2016.12.057

**China**

Huang, L.-L., Ikeda, K., Chiang, C.-M., Kagi, N., Hojo, S., & Yanagi, u. (2011). [Field Survey on the Relation between IAQ and Occupants' Health in 40 Houses in Southern Taiwan](https://www.tandfonline.com/doi/abs/10.3130/jaabe.10.249). *Journal of Asian Architecture and Building Engineering, 10*. doi:10.3130/jaabe.10.249

Huang, L.-l., Ikeda, K., Hojo, S., Kagi, N., & Juan, H.-C. (2014). [Study of the different Cutoff Point of the QEESI Questionnaire as a Screening Tool for Sick Building Syndrome Diagnosis in Taiwan](https://www.tandfonline.com/doi/abs/10.3130/jaabe.13.507). *Journal of Asian Architecture and Building Engineering, 13*(2), 507-513. doi:10.3130/jaabe.13.507

**Columbia**

Storino, V., Muñoz-Ortiz, J., Villabona-Martinez, V., Villamizar-Sanjuán, J. D., Rojas-Carabali, W., & de-la-Torre, A. (2021). [An Unusual Case of Multiple Food Allergies Comorbid with Multiple Chemical Sensitivity: A Case Report](https://pubmed.ncbi.nlm.nih.gov/33833533/). *Journal of asthma and allergy*, *14*, 317–323. <https://doi.org/10.2147/JAA.S293248>

**Denmark**

Dantoft, T. M., Elberling, J., Brix, S., Szecsi, P. B., Vesterhauge, S., & Skovbjerg, S. (2014). [An elevated pro-inflammatory cytokine profile in multiple chemical sensitivity](https://pubmed.ncbi.nlm.nih.gov/24485486/). *Psychoneuroendocrinology, 40*, 140-150. doi:10.1016/j.psyneuen.2013.11.012

Hauge, C. R., Rasmussen, A., Piet, J., Bonde, J. P., Jensen, C., Sumbundu, A., & Skovbjerg, S. (2015). [Mindfulness-based cognitive therapy (MBCT) for multiple chemical sensitivity (MCS): Results from a randomized controlled trial with 1 year follow-up](https://pubmed.ncbi.nlm.nih.gov/26311155/). *Journal of Psychosomatic Research, 79*(6), 628-634. doi:10.1016/j.jpsychores.2015.06.010

Skovbjerg, S., Berg, N. D., Elberling, J., & Christensen, K. B. (2012). [Evaluation of the Quick Environmental Exposure and Sensitivity Inventory in a Danish Population](https://pubmed.ncbi.nlm.nih.gov/22529872/). *Journal of Environmental and Public Health, 2012*, 304314. doi:10.1155/2012/304314

Tran, M. T. D., Skovbjerg, S., Arendt-Nielsen, L., Bech, P., Lunde, M., & Elberling, J. (2014). [Two of three patients with multiple chemical sensitivity had less symptoms and secondary hyperalgesia after transcranially applied pulsed electromagnetic fields](https://pubmed.ncbi.nlm.nih.gov/29913674/). *Scand J Pain, 5*(2), 104-109. doi:10.1016/j.sjpain.2013.11.008

Tran, M. T. D., Skovbjerg, S., Arendt-Nielsen, L., Christensen, K. B., & Elberling, J. (2017). [A randomised, placebo-controlled trial of transcranial pulsed electromagnetic fields in patients with multiple chemical sensitivity](https://pubmed.ncbi.nlm.nih.gov/27919300/). *Acta Neuropsychiatrica. Officieel Wetenschappelijk Orgaan van Het IGBP (Interdisciplinair Genootschap voor Biologische Psychiatrie), 29*(5), 267-277. doi:10.1017/neu.2016.51

**Finland**

Heinonen-Guzejev, M., Koskenvuo, M., Mussalo-Rauhamaa, H., Vuorinen, H., Heikkil‰, K., & Kaprio, J. (2012). [Noise sensitivity and multiple chemical sensitivity scales: Properties in a population based epidemiological study](https://pubmed.ncbi.nlm.nih.gov/23117535/). *Noise and Health, 14*(60), 215-223. doi:10.4103/1463-1741.102956

Selinheimo, S., Vuokko, A., Hublin, C., Järnefelt, H., Karvala, K., Sainio, M., . . . Paunio, T. (2019). [Health-related quality among life of employees with persistent nonspecific indoor-air-associated health complaints](https://pubmed.ncbi.nlm.nih.gov/30935665/). *Journal of Psychosomatic Research, 122*, 112-120. doi:10.1016/j.jpsychores.2019.03.181

Vuokko, A., Karvala, K., Suojalehto, H., Lindholm, H., Selinheimo, S., Heinonen-Guzejev, M., . . . Sainio, M. (2019). [Clinical Characteristics of Disability in Patients with Indoor Air-Related Environmental Intolerance](https://pubmed.ncbi.nlm.nih.gov/31497334/). *Safety and health at work, 10*(3), 362-369. doi:10.1016/j.shaw.2019.06.003

**France**

Kamoun, H., Romdhane, N. A., Rekik, W., Laadheri, N., Youssef, I., Ben Salah, F., & Gharbi, R. (2011). [Multiple chemical sensitivity syndrome. Observation of a cohort of 20 workers](https://www.scopus.com/record/display.uri?eid=2-s2.0-79951849823&doi=10.1016%2fj.admp.2010.08.006&origin=inward&txGid=c249691209fcf8f61ecc445ef4600f18). *Archives des Maladies Professionnelles et de l'Environnement*, *72*(1), 73-79. https://doi.org/10.1016/j.admp.2010.08.006

**Germany**

Bauer, A., Schwarz, E., Martens, U. (2007). [Patients with multiple chemical sensitivities: A case for environmental or psychosomatic medicine?](https://www.thieme-connect.com/products/ejournals/abstract/10.1055/s-2007-991153) Zeitschrift fur Allgemeinmedizin, 83(11):442-446.

Schnakenberg, E., Fabig, K. R., Stanulla, M., Strobl, N., Lustig, M., Fabig, N., & Schloot, W. (2007). [A cross-sectional study of self-reported chemical-related sensitivity is associated with gene variants of drug-metabolizing enzymes](https://pubmed.ncbi.nlm.nih.gov/17291352/). *Environmental health : a global access science source*, *6*, 6. https://doi.org/10.1186/1476-069X-6-6

**Indonesia**

Hildebrandt, S., Kubota, T., Sani, H. A., & Surahman, U. (2019). [*Indoor Air Quality and Health in Newly Constructed Apartments in Developing Countries: A Case Study of Surabaya, Indonesia*](https://www.mdpi.com/2073-4433/10/4/182). *Atmosphere.* 10(4):182

Kubota, T., Sani, H. A., Hildebrandt, S., & Surahman, U. (2020). [Indoor air quality and self-reported multiple chemical sensitivity in newly constructed apartments in Indonesia](https://www-scopus-com.libproxy.uthscsa.edu/record/display.uri?eid=2-s2.0-85087144834&origin=resultslist&sort=plf-f&src=s&sid=f877035821bd51bd6abba8c65c3d5b83&sot=b&sdt=b&sl=126&s=TITLE-ABS-KEY%28Indoor+air+quality+and+self-reported+multiple+chemical+sensitivity+in+newly+constructed+apartments+in+Indonesia%29&relpos=0&citeCnt=0&searchTerm=). *Architectural Science Review*. https://doi.org/10.1080/00038628.2020.1779647

**Italy**

Caccamo, D., Cesareo, E., Mariani, S., Raskovic, D., Ientile, R., Currò, M., . . . De Luca, C. (2013). [Xenobiotic sensor- and metabolism-related gene variants in environmental sensitivity-related illnesses: a survey on the Italian population](https://pubmed.ncbi.nlm.nih.gov/23936614/). *Oxidative Medicine and Cellular Longevity, 2013*, 831969. doi:10.1155/2013/831969

De Luca, C., Scordo, M. G., Cesareo, E., Pastore, S., Mariani, S., Maiani, G., . . . Korkina, L. G. (2010). [Biological definition of multiple chemical sensitivity from redox state and cytokine profiling and not from polymorphisms of xenobiotic-metabolizing enzymes](https://pubmed.ncbi.nlm.nih.gov/20430047/). *Toxicology and Applied Pharmacology, 248*(3), 285-292. doi:10.1016/j.taap.2010.04.017

De Luca, C., Thai, J. C., Raskovic, D., Cesareo, E., Caccamo, D., Trukhanov, A., & Korkina, L. (2014). [Metabolic and genetic screening of electromagnetic hypersensitive subjects as a feasible tool for diagnostics and intervention](https://pubmed.ncbi.nlm.nih.gov/24812443/). *Mediators of Inflammation, 2014*, 924184. doi:10.1155/2014/924184

De Luca, C., Gugliandolo, A., Calabrò, C., Currò, M., Ientile, R., Raskovic, D., . . . Caccamo, D. (2015). [Role of Polymorphisms of Inducible Nitric Oxide Synthase and Endothelial Nitric Oxide Synthase in Idiopathic Environmental Intolerances](https://pubmed.ncbi.nlm.nih.gov/25878398/). *Mediators of Inflammation, 2015*, 245308. doi:10.1155/2015/245308

Gugliandolo, A., Gangemi, C., Calabrò, C., Vecchio, M., Di Mauro, D., Renis, M., . . . Caccamo, D. (2016). [Assessment of glutathione peroxidase-1 polymorphisms, oxidative stress and DNA damage in sensitivity-related illnesses](https://pubmed.ncbi.nlm.nih.gov/26685757/). *Life Sciences, 145*, 27-33. doi:10.1016/j.lfs.2015.12.028

Micarelli, A., Viziano, A., Bruno, E., Micarelli, E., & Alessandrini, M. (2016). [Vestibular impairment in Multiple Chemical Sensitivity: Component analysis findings](https://pubmed.ncbi.nlm.nih.gov/28262643/). *Journal of Vestibular Research, 26*(5-6), 459-468. doi:10.3233/ves-160594

Micarelli, A., Viziano, A., Genovesi, G., Bruno, E., Ottaviani, F., & Alessandrini, M. (2016). [Lack of contralateral suppression in transient-evoked otoacoustic emissions in multiple chemical sensitivity: a clinical correlation study](https://pubmed.ncbi.nlm.nih.gov/27157687/). *Noise Health, 18*(82), 143-149. doi:10.4103/1463-1741.181997

Viziano, A., Micarelli, A., & Alessandrini, M. (2017). [Noise sensitivity and hyperacusis in patients affected by multiple chemical sensitivity](https://pubmed.ncbi.nlm.nih.gov/27838888/). *International Archives of Occupational and Environmental Health, 90*(2), 189-196. doi:10.1007/s00420-016-1185-8

**Japan**

Azuma, K., Uchiyama, I., Takano, H., Tanigawa, M., Azuma, M., Bamba, I., & Yoshikawa, T. (2013). [Changes in cerebral blood flow during olfactory stimulation in patients with multiple chemical sensitivity: a multi-channel near-infrared spectroscopic study](https://pubmed.ncbi.nlm.nih.gov/24278291/). *PloS One, 8*(11), e80567. doi:10.1371/journal.pone.0080567

Azuma, K., Uchiyama, I., Katoh, T., Ogata, H., Arashidani, K., & Kunugita, N. (2015a). [Prevalence and Characteristics of Chemical Intolerance: A Japanese Population-Based Study](https://pubmed.ncbi.nlm.nih.gov/25137616/). *Archives of Environmental & Occupational Health, 70*(6), 341-353. doi:10.1080/19338244.2014.926855

Azuma, K., Uchiyama, I., Tanigawa, M., Bamba, I., Azuma, M., Takano, H., . . . Sakabe, K. (2015b). [Assessment of cerebral blood flow in patients with multiple chemical sensitivity using near-infrared spectroscopy--recovery after olfactory stimulation: a case-control study](https://pubmed.ncbi.nlm.nih.gov/25682122/). *Environmental Health and Preventive Medicine, 20*(3), 185-194. doi:10.1007/s12199-015-0448-4

Azuma, K., Uchiyama, I., Tanigawa, M., Bamba, I., Azuma, M., Takano, H., . . . Sakabe, K. (2016). [Association of Odor Thresholds and Responses in Cerebral Blood Flow of the Prefrontal Area during Olfactory Stimulation in Patients with Multiple Chemical Sensitivity](https://pubmed.ncbi.nlm.nih.gov/27936122/). *PloS One, 11*(12), e0168006. doi:10.1371/journal.pone.0168006

Azuma, K., Uchiyama, I., & Kunugita, N. (2019). [Factors affecting self-reported chemical intolerance: A five-year follow-up study in Japan](https://pubmed.ncbi.nlm.nih.gov/30782347/). *Journal of Psychosomatic Research, 118*, 1-8. doi:10.1016/j.jpsychores.2019.01.001

Cui, X., Lu, X., Hiura, M., Oda, M., Miyazaki, W., & Katoh, T. (2013). [Evaluation of genetic polymorphisms in patients with multiple chemical sensitivity](https://pubmed.ncbi.nlm.nih.gov/23967348/). *PloS One, 8*(8), e73708-e73708. doi:10.1371/journal.pone.0073708

Cui, X., Lu, X., Hiura, M., Oda, M., Hisada, A., Miyazaki, W., . . . Katoh, T. (2014). [Prevalence and interannual changes in multiple chemical sensitivity in Japanese workers](https://pubmed.ncbi.nlm.nih.gov/24477857/). *Environmental Health and Preventive Medicine, 19*(3), 215-219. doi:10.1007/s12199-014-0378-6

Cui, X., Lu, X., Hisada, A., Fujiwara, Y., & Katoh, T. (2015). [The correlation between mental health and multiple chemical sensitivity: a survey study in Japanese workers](https://pubmed.ncbi.nlm.nih.gov/25500796/). *Environmental Health and Preventive Medicine, 20*(2), 123-129. doi:10.1007/s12199-014-0434-2

Fujimori, S., Hiura, M., Yi, C. X., Xi, L., & Katoh, T. (2012). [Factors in genetic susceptibility in a chemical sensitive population using QEESI](https://pubmed.ncbi.nlm.nih.gov/22205546/). *Environmental Health and Preventive Medicine, 17*(5), 357-363. doi:10.1007/s12199-011-0260-8

Hasegawa, M., Ohtomo, M., Mizuki, M., & Akiyama, K. (2009). [[Diagnosis of multiple chemical sensitivity by chemical compounds exposure tests](https://pubmed.ncbi.nlm.nih.gov/19329873/)]. *Arerugi, 58*(2), 112-118.

Hojo, S. (2002). [A questionnaire survey of multiple chemical sensitivity in Japan by using QEESI](https://www.scopus.com/inward/record.uri?eid=2-s2.0-0036624796&partnerID=40&md5=de201b071c1e963bae69303824029393). *Neuro-Ophthalmology Japan, 19*(2), 169-175.

Hojo, S., Kumano, H., Yoshino, H., Kakuta, K., & Ishikawa, S. (2003). [Application of Quick Environment Exposure Sensitivity Inventory (QEESI©) for Japanese population: study of reliability and validity of the questionnaire](https://pubmed.ncbi.nlm.nih.gov/15697173/). *Toxicology and Industrial Health, 19*(2-6), 41-49. doi:10.1191/0748233703th180oa

Hojo, S., Yoshino, H., Kumano, H., Kakuta, K., Miyata, M., Sakabe, K., . . . Ishikawa, S. (2005). [Use of QEESI© questionnaire for a screening study in Japan](https://journals.sagepub.com/doi/abs/10.1191/0748233705th219oa?casa_token=uJWdSAEH8loAAAAA:5ri9NNpNPQXNGGyWQiSlBgsrPBD6IiXTEVITwCBFw2gw0NWh3hVCNuBzVNk42y7xkn3LCJCGjtE35ck). *Toxicology and Industrial Health, 21*(3-4), 113-124. doi:10.1191/0748233705th219oa

Hojo, S., Ishikawa, S., Kumano, H., Miyata, M., & Sakabe, K. (2008). [Clinical characteristics of physician-diagnosed patients with multiple chemical sensitivity in Japan](https://pubmed.ncbi.nlm.nih.gov/18155642/). *International Journal of Hygiene and Environmental Health, 211*(5-6), 682-689. doi:10.1016/j.ijheh.2007.09.007

Hojo, S., Sakabe, K., Ishikawa, S., Miyata, M., & Kumano, H. (2009). [Evaluation of subjective symptoms of Japanese patients with multiple chemical sensitivity using QEESI©](https://pubmed.ncbi.nlm.nih.gov/19603254/). *Environmental Health and Preventive Medicine, 14*, 267-275.

Hojo, S., Mizukoshi, A., Azuma, K., Okumura, J., Ishikawa, S., Miyata, M., . . . Sakabe, K. (2018). [Survey on changes in subjective symptoms, onset/trigger factors, allergic diseases, and chemical exposures in the past decade of Japanese patients with multiple chemical sensitivity](https://pubmed.ncbi.nlm.nih.gov/30115513/). *International Journal of Hygiene and Environmental Health, 221*(8), 1085-1096. doi:10.1016/j.ijheh.2018.08.001

Hojo, S., Mizukoshi, A., Azuma, K., Okumura, J., Mizuki, M., & Miyata, M. (2019). [New criteria for multiple chemical sensitivity based on the Quick Environmental Exposure and Sensitivity Inventory developed in response to rapid changes in ongoing chemical exposures among Japanese](https://pubmed.ncbi.nlm.nih.gov/31026284/). *PloS One, 14*(4), e0215144-e0215144. doi:10.1371/journal.pone.0215144

Ishibashi, M., Tonori, H., Miki, T., Miyajima, E., Kudo, Y., Tsunoda, M., Sakabe, K., & Aizawa, Y. (2007). [Classification of patients complaining of sick house syndrome and/or multiple chemical sensitivity.](https://www.scopus.com/record/display.uri?eid=2-s2.0-33947649685&doi=10.1620%2ftjem.211.223&origin=inward&txGid=bce8c43195a575a7f6dc1b4288cee6b3) *Tohoku Journal of Experimental Medicine*, *211*(3), 223-233. https://doi.org/10.1620/tjem.211.223

Lu, X., Hisada, A., Anai, A., Nakashita, C., Masuda, S., Fujiwara, Y., . . . Katoh, T. (2020). [Study of the Correlation Between Multiple Chemical Sensitivity and Personality Using the Quick Environmental Exposure Sensitivity Inventory Questionnaire and the Temperament and Character Inventory](https://pubmed.ncbi.nlm.nih.gov/32730039/). *Journal of Occupational and Environmental Medicine, 62*(7), e348-e354. doi:10.1097/jom.0000000000001899

Manabe, R., Kunugita, N., Katoh, T., Kuroda, Y., Akiyama, Y., Yamano, Y., . . . Arashidani, K. (2008). [[Questionnaire survey of workers in specific buildings regarding multiple chemical sensitivity](https://pubmed.ncbi.nlm.nih.gov/18840946/)]. *Nihon Eiseigaku Zasshi. Japanese Journal of Hygiene, 63*(4), 717-723. doi:10.1265/jjh.63.717

Mizuki, M. (2004) [Effect of environmental factors in patients with multiple chemical sensitivity](https://www.scopus.com/record/display.uri?eid=2-s2.0-4143090290&origin=inward&txGid=381e1871ba6a2c2b64e4a6b054f6b5a8)*. IRYO-Japanese Journal of National Medical Services, 58*(7), 399-407.

Mizuki, M. (2004) [Intractable factors in patients with chemical sensitivity](https://www.scopus.com/inward/record.uri?eid=2-s2.0-84929409032&partnerID=40&md5=b05bdcf5794122f59fc28826c1db4dfb). *IRYO-Japanese Journal of National Medical Services, 69*(3), 117-126.

Mizukoshi, A., Kumagai, K., Yamamoto, N., Noguchi, M., Yoshiuchi, K., Kumano, H., . . . Yanagisawa, Y. (2015). [In-situ Real-Time Monitoring of Volatile Organic Compound Exposure and Heart Rate Variability for Patients with Multiple Chemical Sensitivity](https://pubmed.ncbi.nlm.nih.gov/26445055/). *International Journal of Environmental Research and Public Health, 12*(10), 12446-12465. doi:10.3390/ijerph121012446

Nakaoka, H., Suzuki, N., Nakayama, Y., Takaya, K., Todaka, E., and Mori, C. (2018). [A preliminary study to investigate the relationships between indoor environment and its effect on physical and mental health](https://www.witpress.com/elibrary/wit-transactions-on-ecology-and-the-environment/230/36792). WIT Transactions on Ecology and the Environment, *230*, 567-576.

Ohsawa, M., Takayama, S., Kikuchi, A., Arita, R., Saito, N., Hojo, S., . . . Yaegashi, N. (2020). [Two Cases of Multiple Chemical Sensitivity Successfully Treated With Kampo Medicine](https://pubmed.ncbi.nlm.nih.gov/32827411/). *Alternative Therapies in Health and Medicine*.

Suzuki, N., Nakaoka, H., Nakayama, Y., Tsumura, K., Takaguchi, K., Takaya, K., . . . Mori, C. (2020). [Association between sum of volatile organic compounds and occurrence of building-related symptoms in humans: A study in real full-scale laboratory houses](https://pubmed.ncbi.nlm.nih.gov/32882497/). *Science of the Total Environment, 750*, 141635. doi:10.1016/j.scitotenv.2020.141635

Watai, K., Fukutomi, Y., Hayashi, H., Kamide, Y., Sekiya, K., & Taniguchi, M. (2018). [Epidemiological association between multiple chemical sensitivity and birth by caesarean section: a nationwide case-control study](https://pubmed.ncbi.nlm.nih.gov/30547814/). *Environmental Health, 17*(1), 89. doi:10.1186/s12940-018-0438-2

Yoshino, H., Amano, K., Matsumoto, M., Netsu, K., Ikeda, K., Nozaki, A., . . . Ishikawa, S. (2004). [Long-Termed Field Survey of Indoor Air Quality and Health Hazards in Sick House](https://www.tandfonline.com/doi/abs/10.3130/jaabe.3.297). *Journal of Asian Architecture and Building Engineering, 3*(2), 297-303. doi:10.3130/jaabe.3.297

**Saudi Arabia**

Khalil, A. I., Almutairi, M. S., & Ahmed, M. E. (2020). [Assessing risk factors of Autism Spectrum Disorders (ASD) and Attention Deficit Hyperactivity Disorder (ADHD) among Saudi Mothers: A retrospective study](https://www.scopus.com/record/display.uri?eid=2-s2.0-85099843797&doi=10.3371%2fCSRP.IASM.092320&origin=inward&txGid=2dd3c6dbe6f01949c3ece8bbae473500) [Article]. *Clinical Schizophrenia and Related Psychoses*, *14*(1), Article 092320. https://doi.org/10.3371/CSRP.IASM.092320

**South Korea**

Heo, Y., Kim, S. H., Lee, S. K., & Kim, H. A. (2017). [Factors Contributing to the Self-Reported Prevalence of Multiple Chemical Sensitivity in Public Facility Workers and the General Population of Korea](https://pubmed.ncbi.nlm.nih.gov/29249738/). *J uoeh, 39*(4), 249-258. doi:10.7888/juoeh.39.249

Jeon, B. H. L., S.H.; Kim H.A. (2012). [A Validation of the Korean Version of QEESI(c) (The Quick Environmental Exposure and Sensitivity Inventory)](https://www.koreamed.org/SearchBasic.php?RID=2035678&DT=1). *Korean Journal of Occupational and Environmental Medicine., 24*(1), 96-114.

Jeong, I., Kim, I., Park, H. J., Roh, J., Park, J. W., & Lee, J. H. (2014). [Allergic diseases and multiple chemical sensitivity in Korean adults](https://pubmed.ncbi.nlm.nih.gov/25228997/). *Allergy, Asthma & Immunology Research, 6*(5), 409-414. doi:10.4168/aair.2014.6.5.409

Yun, M. J., Kang, D. M., Lee, K. H., Kim, Y. K., & Kim, J. E. (2013). [Multiple chemical sensitivity caused by exposure to ignition coal fumes: a case report](https://pubmed.ncbi.nlm.nih.gov/24472417/). *Ann Occup Environ Med, 25*(1), 32. doi:10.1186/2052-4374-25-32

**Spain**

Aguilar-Aguilar, E., Marcos-Pasero, H., de la Iglesia, R., Espinosa-Salinas, I., Ramírez de Molina, A., Reglero, G., & Loria-Kohen, V. (2018). [Characteristics and determinants of dietary intake and physical activity in a group of patients with multiple chemical sensitivity](https://pubmed.ncbi.nlm.nih.gov/30309810/). *Endocrinol Diabetes Nutr, 65*(10), 564-570. doi:10.1016/j.endinu.2018.07.009

Alobid, I., Nogué, S., Izquierdo-Dominguez, A., Centellas, S., Bernal-Sprekelsen, M., & Mullol, J. (2014). [Multiple chemical sensitivity worsens quality of life and cognitive and sensorial features of sense of smell](https://pubmed.ncbi.nlm.nih.gov/24687801/). *European Archives of Oto-Rhino-Laryngology, 271*(12), 3203-3208. doi:10.1007/s00405-014-3015-5

Fernandez-Solà, J. (2005). [Chronic fatigue syndrome and fibromyalgia in patients affected with multiple chemical sensitivity](https://www.researchgate.net/profile/Esther-Gomez-Gil/publication/237430278_CHRONIC_FATIGUE_SYNDROME_AND_FIBROMYALGIA_IN_PATIENTS_AFFECTED_OF_MULTIPLE_CHEMICAL_SENSITIVITY/links/550d02ae0cf2128741629a8b/CHRONIC-FATIGUE-SYNDROME-AND-FIBROMYALGIA-IN-PATIENTS-AFFECTED-OF-MULTIPLE-CHEMICAL-SENSITIVITY.pdf). Med Clin (Barc); 124: 451-453.

García-Sierra, R., & Álvarez-Moleiro, M. (2014). [Evaluation of suffering in individuals with multiple chemical sensitivity](https://www.sciencedirect.com/science/article/pii/S1130527414000073). *Clínica y Salud, 25*(2), 95-103. doi:https://doi.org/10.1016/j.clysa.2014.06.006

Lago Blanco, E., Puiguriguer Ferrando, J., Rodríguez Enríquez, M., Agüero Gento, L., Salvà Coll, J., & Pizà Portell, M. R. (2016). [Multiple chemical sensitivity: Clinical evaluation of the severity and psychopathological profile](https://www.scopus.com/record/display.uri?eid=2-s2.0-84955215831&doi=10.1016%2fj.medcli.2015.09.016&origin=inward&txGid=facc6a8dce33b100978362e8708dc277). *Medicina Clínica*, *146*(3), 108-111. https://doi.org/10.1016/j.medcli.2015.09.016

Mena, G., Sequera, V. G., Nogué-Xarau, S., Ríos, J., Bertran, M. J., & Trilla, A. (2013). [[Translation and cross-cultural adaptation of the Quick Environmental Exposure and Sensitivity Inventory for use in the Spanish population](https://pubmed.ncbi.nlm.nih.gov/23347502/)]. *Medicina Clínica, 140*(7), 302-304. doi:10.1016/j.medcli.2012.10.024

Nogué, S., Fernández-Solá, J., Rovira, E., Montori, E., Fernández-Huerta, J. M., & Munné, P. (2007). [[Multiple chemical sensitivity: study of 52 cases](https://pubmed.ncbi.nlm.nih.gov/17594860/)]. *Medicina Clínica, 129*(3), 96-98; quiz 99. doi:10.1157/13107370

Paredes Rizo, M. (2018). [Multiple Chemical Sensitivity: analysis of a case registered in a reference Hospital](https://www.researchgate.net/publication/329556186_Multiple_Chemical_Sensitivity_analysis_of_a_case_registered_in_a_reference_hospital). *Medicine and Occupational Safety*, *64* (251), 217-240.

Pérez-Crespo, J., Lobato-Cañón, R., & Solanes-Puchol, Á. (2018). [Multiple Chemical Sensitivity in Chemical Laboratory Workers](https://pubmed.ncbi.nlm.nih.gov/30559998/). *Safety and health at work, 9*(4), 473-478. doi:10.1016/j.shaw.2018.03.001

**Sweden**

Andersson, M. J., Andersson, L., Bende, M., Millqvist, E., & Nordin, S. (2009). [The idiopathic environmental intolerance symptom inventory: development, evaluation, and application](https://pubmed.ncbi.nlm.nih.gov/19542897/). *Journal of Occupational and Environmental Medicine, 51*(7), 838-847. doi:10.1097/JOM.0b013e3181a7f021

Nordin, S., & Andersson, L. (2010). [Evaluation of a Swedish version of the Quick Environmental Exposure and Sensitivity Inventory](https://pubmed.ncbi.nlm.nih.gov/19468745/). *International Archives of Occupational and Environmental Health, 83*(1), 95-104. doi:10.1007/s00420-009-0427-4

**United States**

Gould Peek, G., & Wallace Lyon, M. (2014). [Housing and Health Relationship: Multiple Chemical Sensitivity (MCS)](https://www.tandfonline.com/doi/abs/10.1080/08882746.2014.11430620?casa_token=vnM8inWz2r0AAAAA:jqdP_FLj0Z1vqA9Rxe0t1XZfKk4qZ4ScUqZbcsvX1pFeIE1s3vns57jxiQJ28kREjXNtxAbGtiXEINow). *Housing and Society, 41*(1), 31-52. doi:10.1080/08882746.2014.11430620

Heilbrun, L. P., Palmer, R. F., Jaen, C. R., Svoboda, M. D., Perkins, J., & Miller, C. S. (2015). [Maternal Chemical and Drug Intolerances: Potential Risk Factors for Autism and Attention Deficit Hyperactivity Disorder (ADHD)](https://pubmed.ncbi.nlm.nih.gov/26152436/). *Journal of the American Board of Family Medicine, 28*(4), 461-470. doi:10.3122/jabfm.2015.04.140192

Katerndahl, D. A., Bell, I. R., Palmer, R. F., & Miller, C. S. (2012). [Chemical intolerance in primary care settings: prevalence, comorbidity, and outcomes](https://pubmed.ncbi.nlm.nih.gov/22778124/). *Annals of Family Medicine, 10*(4), 357-365. doi:10.1370/afm.1346

Miller, C. S., & Prihoda, T. J. (1999b). [The Environmental Exposure and Sensitivity Inventory (EESI): a standardized approach for measuring chemical intolerances for research and clinical applications](https://pubmed.ncbi.nlm.nih.gov/10416289/). *Toxicology and Industrial Health, 15*(3-4), 370-385. doi:10.1177/074823379901500311

Miller, C. S., & Prihoda, T. J. (1999b). [A controlled comparison of symptoms and chemical intolerances reported by Gulf War veterans, implant recipients and persons with multiple chemical sensitivity](https://pubmed.ncbi.nlm.nih.gov/10416290/). *Toxicology and Industrial Health, 15*(3-4), 386-397. doi:10.1177/074823379901500312

Palmer, R. F., Jaén, C. R., Perales, R. B., Rincon, R., Forster, J. N., & Miller, C. S. (2020). [Three questions for identifying chemically intolerant individuals in clinical and epidemiological populations: The Brief Environmental Exposure and Sensitivity Inventory (BREESI)](https://pubmed.ncbi.nlm.nih.gov/32936802/). *PloS One, 15*(9), e0238296. doi:10.1371/journal.pone.0238296

**Uruguay**

De Ben, S., Sponton, F. Chaves, E., Medina, F., Tomasina, F. (2014.) [Multiple chemical sensitivity: a challenge for occupational health](http://www.scielo.edu.uy/scielo.php?pid=S1688-03902014000200007&script=sci_arttext). Rev Med Urug, 30: 123-127.
